# Supplementary material
Source: MDPI journal article supplement (https://www.mdpi.com/2076-3263/11/11/452)
Supplement: s1 [file s1]

# Metamorphic Conditions and Raman Spectroscopic Carbonaceous Material Thermometry of Host Schists of Olympiada and Eldorado Gold Deposits (Yenisey Ridge, Russia)

Vasiliy Sukhorukov <sup>1,2,\*</sup>, Valeriya Volkova <sup>1</sup>, Peter Nevolko <sup>1,2</sup> and Pavel Kozlov <sup>3</sup>

<sup>1</sup> Sobolev Institute of Geology and Mineralogy, Siberian Branch of Russian Academy of Sciences, Koptugaav. 3, 630090 Novosibirsk, Russia

<sup>2</sup> Department of Geology and Geophysics, Novosibirsk State University, Pirogova str. 2, 630090 Novosibirsk, Russia

<sup>3</sup> Zavaritskii Institute of Geology and Geochemistry, Ural Branch of the Russian Academy of Sciences, 7 per. Pochtovii, Ekaterinburg 620151, Russia

\* Correspondence: svp@igm.nsc.ru

## Supplementary Materials

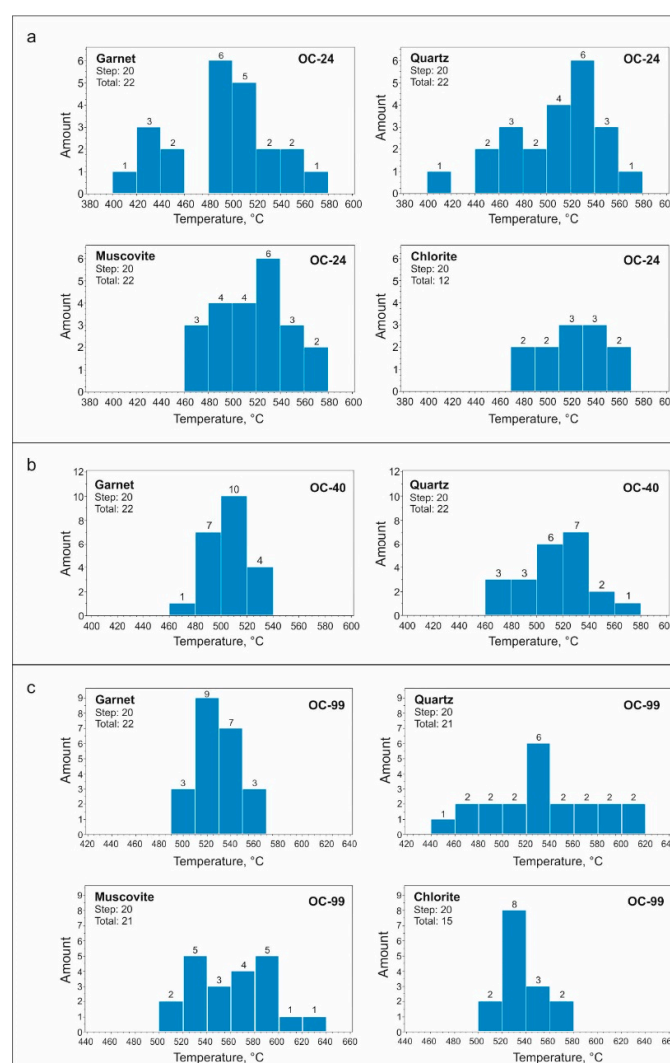

**Figure S1.** Distribution histograms of temperatures estimated with carbonaceous material thermometry [3] for different mineral phases. **a**—OC-24, **b**—OC-40, **c**—OC-99.

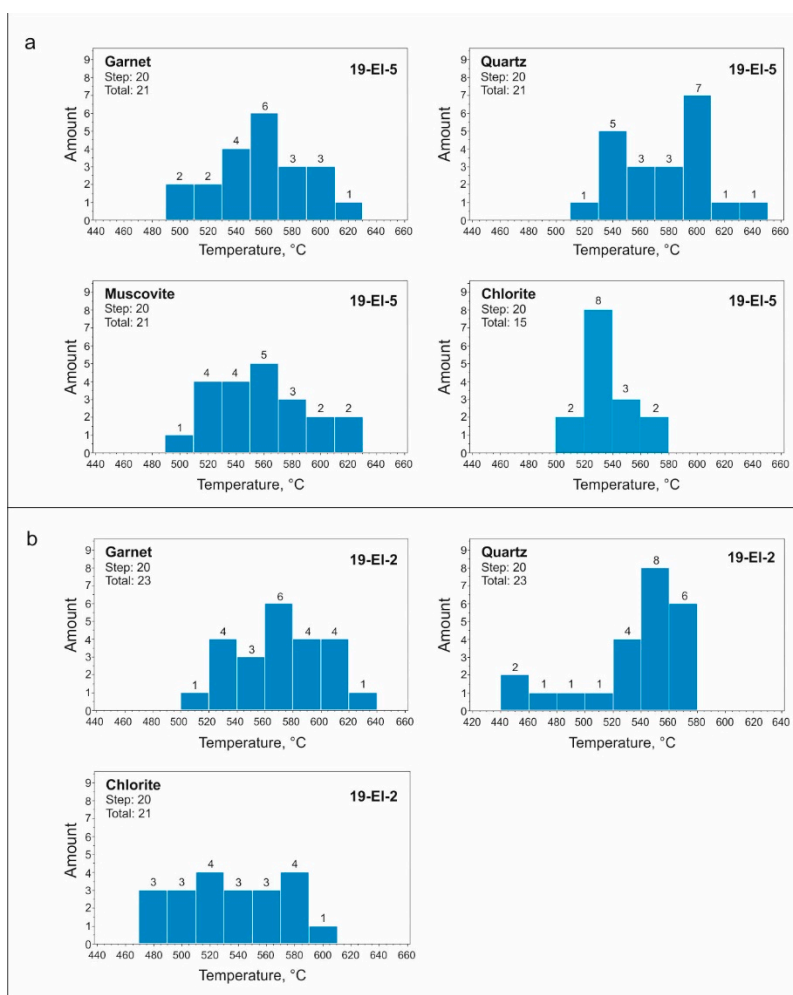

**Figure S2.** Distribution histograms of temperatures estimated with carbonaceous material thermometry [3] for different mineral phases. **a**—19-EI-5, **b**—19-EI-2.
